# Supplementary material
Source: PubMed Central journal article supplement (PMC10523357)
Supplement: NIHMS1931607-supplement-1.pdf [file NIHMS1931607-supplement-1.pdf]

1  
2  
3  
4  
5  
6  
7  
8  
9  
10  
11

**SUPPLEMENTARY FIGURE**

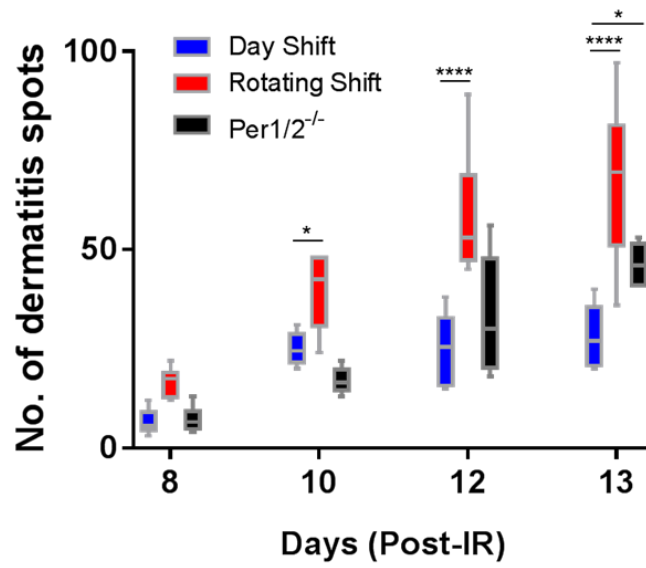

12 **Fig. S1.** Box plot representation of observed radiodermatitis spots in mice from days 8 through  
13 13 post-TBI. Statistical analysis was done using Repeated Measures Two-way ANOVA.  
14 \*= $p < 0.05$ , \*\*\*\*= $p < 0.0001$  (n=5-6 per group).
